# Supplementary material for: LaPO4-coated Li1.2Mn0.56Ni0.16Co0.08O2 as a cathode material with enhanced coulombic efficiency and rate capability for lithium ion batteries
Source: Royal Society of Chemistry journal article supplement (doi:10.1039/c5ra13233a), 2015-01-01
Supplement: c5ra13233a1.pdf [file c5ra13233a1.pdf]

## Supporting information

### **LaPO<sub>4</sub>-coated Li<sub>1.2</sub>Mn<sub>0.56</sub>Ni<sub>0.16</sub>Co<sub>0.08</sub>O<sub>2</sub> as cathode materials with enhanced Coulombic efficiency and rate capability for lithium ion batteries**

Qingliang Xie<sup>1</sup>, Chenhao Zhao<sup>2</sup>, Zhibiao Hu<sup>2</sup>, Qi Huang<sup>1</sup>, Cheng Chen<sup>1</sup>, Kaiyu Liu<sup>\*1,2</sup>

\*Corresponding author.

Tel.: +86-13548590751; e-mail: [kaiyuliu67@263.net](mailto:kaiyuliu67@263.net).

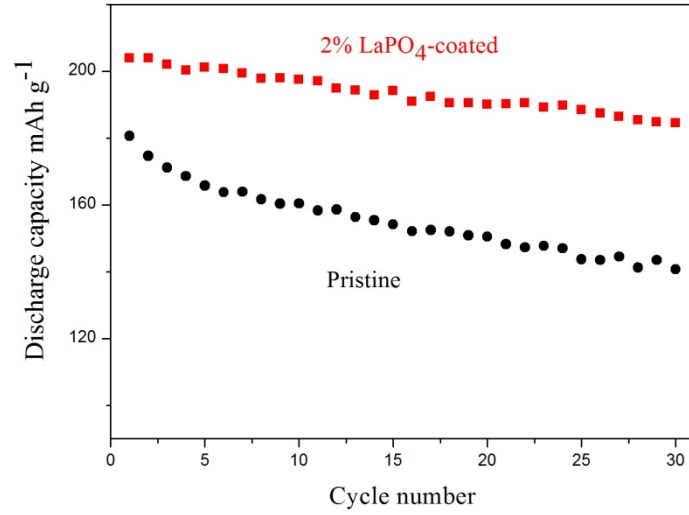

Fig.S1 Capacity retention of the pristine  $\text{Li}_{1.2}\text{Mn}_{0.56}\text{Ni}_{0.16}\text{Co}_{0.08}\text{O}_2$  and 2%  $\text{LaPO}_4$  coated  $\text{Li}_{1.2}\text{Mn}_{0.56}\text{Ni}_{0.16}\text{Co}_{0.08}\text{O}_2$  electrodes at 55 °C in a potential region between 2.0 and 4.7V at 1 C.

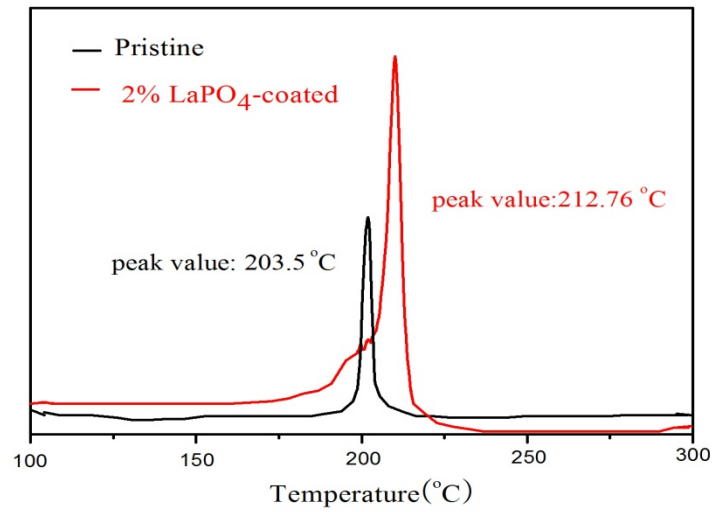

Fig.S2 The DSC curves of the  $\text{Li}_{1.2}\text{Mn}_{0.56}\text{Ni}_{0.16}\text{Co}_{0.08}\text{O}_2$  before and after the surface modification with 2 %  $\text{LaPO}_4$  after charging to 4.7 V (vs.  $\text{Li}/\text{Li}^+$ ) in the first cycle.
